# Supplementary material
Source: HighWire-hosted journal article supplement (http://www.qdcxjkg.com/highwire/filestream/113704/field_highwire_adjunct_files/0/ERJ-01657-2012_Disclosures.pdf)
Supplement: ERJ-01657-2012_Disclosures.pdf [file ERJ-01657-2012_Disclosures.pdf]

**P.L.M.L. Wielders** has received reimbursement for attendance of symposia and speaker's fees from AstraZeneca, GlaxoSmithKline, Novartis Pharma, Boehringer Ingelheim and Chiesi Pharmaceuticals. His research institute has received grants from AstraZeneca and GlaxoSmithKline.

**N. Locantore** is an employee of GlaxoSmithKline, and holds shares of GlaxoSmithKline.

**S. Baggen** is an employee of GlaxoSmithKline.

**R. Chan** is the Director for Clinical Development, Respiratory Therapeutic Area Unit, GlaxoSmithKline, is an employee of GSK and hold stocks and shares of this company.

**J.H. Riley** is employed by and holds stock options in GlaxoSmithKline.
